# Supplementary material
Source: PubMed Central journal article supplement (PMC3608106)
Supplement: NIHMS443254-supplement-Supplemental_figure_1.pdf [file NIHMS443254-supplement-Supplemental_figure_1.pdf]

# A

|                                                        |                                                        |                                                        |                                                        |                                                               |                                                                                                      |
|--------------------------------------------------------|--------------------------------------------------------|--------------------------------------------------------|--------------------------------------------------------|---------------------------------------------------------------|------------------------------------------------------------------------------------------------------|
| 10                                                     | 20                                                     | 30                                                     | 40                                                     | 50                                                            | 60                                                                                                   |
| <b>m</b> AKSGGCGAG                                     | AGVGGGNGAL                                             | TWVNNAAKKE                                             | ESETANKNDS                                             | SKKLSVERVY                                                    | QKKTQLEHIL                                                                                           |
| 70                                                     | 80                                                     | 90                                                     | 100                                                    | 110                                                           | 120                                                                                                  |
| LRPDTYIGSV                                             | EPLTQF <b>m</b> WVY                                    | DEDVG <b>m</b> NCRE                                    | VTFVPGLYKI                                             | <b>FDEILVNAAD</b>                                             | <b>NKQ</b> RDKN <b>m</b> TC                                                                          |
| 130                                                    | 140                                                    | 150                                                    | 160                                                    | 170                                                           | 180                                                                                                  |
| IK                                                     | <b>V</b> SID <b>PESN</b>                               | <b>I</b> ISI <b>W</b> NG <b>KG</b>                     | <b>I</b> PV <b>V</b> EH <b>K</b> VE <b>K</b>           | <b>V</b> Y <b>V</b> PAL <b>I</b> FG <b>Q</b>                  | <b>L</b> L <b>T</b> SS <b>N</b> Y <b>D</b> DD <b>E</b> K <b>K</b> V <b>T</b> G <b>G</b> R <b>N</b> G |
| 190                                                    | 200                                                    | 210                                                    | 220                                                    | 230                                                           | 240                                                                                                  |
| YGAKLCNIFS                                             | TKFTVETACK                                             | EYKHSFKQ <b>T</b> W                                    | <b>m</b> n <b>n</b> <b>m</b> <b>m</b> KTSEA            | KIKHFDGEDY                                                    | TCITFQPDLS                                                                                           |
| 250                                                    | 260                                                    | 270                                                    | 280                                                    | 290                                                           | 300                                                                                                  |
| KFK <b>m</b> EKLDKD                                    | IVAL <b>m</b> TRR <b>A</b> Y                           | <b>D</b> LAG <b>S</b> CR <b>G</b> V <b>K</b>           | <b>V</b> <b>m</b> F <b>N</b> G <b>K</b> KL <b>P</b> V  | NGFRSYVDLY                                                    | V <b>K</b> <b>D</b> KL <b>D</b> ET <b>G</b> V                                                        |
| 310                                                    | 320                                                    | 330                                                    | 340                                                    | 350                                                           | 360                                                                                                  |
| <b>A</b> L <b>K</b> VIHELAN                            | ERWDVCLT <b>L</b> S                                    | E <b>K</b> <b>G</b> F <b>Q</b> Q <b>I</b> S <b>F</b> V | <b>N</b> S <b>I</b> AT <b>T</b> K <b>G</b> GR          | <b>H</b> V <b>D</b> Y <b>V</b> V <b>D</b> Q <b>V</b> V        | <b>G</b> K <b>L</b> I <b>E</b> V <b>V</b> K <b>K</b>                                                 |
| 370                                                    | 380                                                    | 390                                                    | 400                                                    | 410                                                           | 420                                                                                                  |
| NKAGVS <b>V</b> K <b>P</b> F                           | Q <b>V</b> K <b>N</b> H <b>I</b> W <b>V</b> F <b>I</b> | <b>N</b> C <b>L</b> I <b>E</b> N <b>P</b> T <b>F</b> D | <b>S</b> Q <b>T</b> K <b>E</b> N <b>m</b> TLQ          | PKSFGSKCQL                                                    | SEKFF <b>K</b> A <b>A</b> S <b>N</b>                                                                 |
| 430                                                    | 440                                                    | 450                                                    | 460                                                    | 470                                                           | 480                                                                                                  |
| <b>C</b> G <b>I</b> V <b>E</b> S <b>I</b> L <b>N</b> W | <b>V</b> K <b>F</b> K <b>A</b> Q <b>T</b> Q <b>L</b> N | <b>K</b> K <b>C</b> S <b>S</b> V <b>K</b> Y <b>S</b> K | IKGIPKLDDA                                             | NDAGGKHSLE                                                    | CTLILTEGDS                                                                                           |
| 490                                                    | 500                                                    | 510                                                    | 520                                                    | 530                                                           | 540                                                                                                  |
| AKSLAVSGLG                                             | VIGRDRYGVF                                             | PLRGKILNVR                                             | <b>E</b> A <b>S</b> H <b>K</b> Q <b>I</b> <b>m</b> EN  | AEINNIKIV                                                     | GLQYKKS <b>Y</b> DD                                                                                  |
| 550                                                    | 560                                                    | 570                                                    | 580                                                    | 590                                                           | 600                                                                                                  |
| AESLKTLRYG                                             | K <b>I</b> <b>m</b> i <b>m</b> TDQDQ                   | DGSHIKGLLI                                             | NFIHHNWPSL                                             | LKHGFLEEFI                                                    | TPIVKASKNK                                                                                           |
| 610                                                    | 620                                                    | 630                                                    | 640                                                    | 650                                                           | 660                                                                                                  |
| QELSFYSIPE                                             | FDEWKKHIEN                                             | QKAWKIKYYK                                             | GLGTSTAKEA                                             | KEYFAD <b>m</b> ERH                                           | RILFR <b>Y</b> A <b>G</b> P <b>E</b>                                                                 |
| 670                                                    | 680                                                    | 690                                                    | 700                                                    | 710                                                           | 720                                                                                                  |
| <b>D</b> D <b>A</b> A <b>I</b> T <b>L</b> A <b>F</b> S | <b>K</b> K <b>K</b> I <b>D</b> D <b>R</b> K <b>E</b> W | L <b>T</b> N <b>F</b> <b>m</b> E <b>D</b> R <b>R</b> Q | RRLHGLPEQF                                             | LYGTATK <b>H</b> L <b>T</b>                                   | <b>Y</b> N <b>D</b> F <b>I</b> N <b>K</b> E <b>L</b> I                                               |
| 730                                                    | 740                                                    | 750                                                    | 760                                                    | 770                                                           | 780                                                                                                  |
| <b>L</b> F <b>S</b> N <b>S</b> D <b>N</b> E <b>R</b> S | <b>I</b> P <b>S</b> L <b>V</b> D <b>G</b> F <b>K</b> P | <b>G</b> Q <b>R</b> K <b>V</b> L <b>F</b> T <b>C</b> F | KRNDKREVKV                                             | AQLAGSVAE <b>m</b>                                            | SAYHHGEQAL                                                                                           |
| 790                                                    | 800                                                    | 810                                                    | 820                                                    | 830                                                           | 840                                                                                                  |
| <b>m</b> mTIVNLAQN                                     | FVGSNNINLL                                             | QPIGQFGTRL                                             | HGGKDAASPR                                             | YIFT <b>m</b> LSTLA                                           | RLLFPAVDDN                                                                                           |
| 850                                                    | 860                                                    | 870                                                    | 880                                                    | 890                                                           | 900                                                                                                  |
| LLKFLYDDNQ                                             | RVEPEWYIPI                                             | IP <b>m</b> VLINGAE                                    | GIGTGWACKL                                             | PNYDAREIVN                                                    | NVRR <b>m</b> LDGLD                                                                                  |
| 910                                                    | 920                                                    | 930                                                    | 940                                                    | 950                                                           | 960                                                                                                  |
| PHP <b>m</b> LPNYKN                                    | FKGTIQELGQ                                             | NQYAVSGEIF                                             | VVDR <b>N</b> T <b>V</b> E <b>I</b> T                  | <b>E</b> L <b>P</b> V <b>R</b> TWTQV                          | YKEQVLEP <b>m</b> L                                                                                  |
| 970                                                    | 980                                                    | 990                                                    | 1000                                                   | 1010                                                          | 1020                                                                                                 |
| NGTDKTPALI                                             | SDYKEYHTDT                                             | TVKFV <b>V</b> <b>m</b> TE                             | EKLAQAEAAG                                             | LHKVFKLQTT                                                    | LTCNS <b>m</b> VLFD                                                                                  |
| 1030                                                   | 1040                                                   | 1050                                                   | 1060                                                   | 1070                                                          | 1080                                                                                                 |
| <b>H</b> <b>m</b> G <b>L</b> K <b>K</b> Y <b>E</b> T   | VQDILKEFFD                                             | LRLSYYGLRK                                             | EWLVG <b>m</b> LGAE                                    | STKLNNQARF                                                    | ILEKIQGKIT                                                                                           |
| 1090                                                   | 1100                                                   | 1110                                                   | 1120                                                   | 1130                                                          | 1140                                                                                                 |
| IENRSK <b>K</b> D <b>L</b> I                           | Q <b>m</b> L <b>V</b> Q <b>R</b> G <b>Y</b> ES         | DPVKAWKEAQ                                             | EKAAEED <b>E</b> T <b>Q</b>                            | NQHDDSSSDS                                                    | GTPSGPDFNY                                                                                           |
| 1150                                                   | 1160                                                   | 1170                                                   | 1180                                                   | 1190                                                          | 1200                                                                                                 |
| ILN <b>m</b> SLWSLT                                    | KEKVEELIKQ                                             | RDAKGREVND                                             | LKRKSPSDLW                                             | KEDLAAFVEE                                                    | LDKVESQERE                                                                                           |
| 1210                                                   | 1220                                                   | 1230                                                   | 1240                                                   | 1250                                                          | 1260                                                                                                 |
| DVLAG <b>m</b> SGKA                                    | IKGKVGKPKV                                             | KKLQLEET <b>m</b> P                                    | SPYGRR <b>I</b> P <b>E</b>                             | <b>I</b> T <b>A</b> <b>m</b> K <b>A</b> D <b>A</b> S <b>K</b> | <b>K</b> L <b>L</b> K <b>K</b> K <b>G</b> D <b>L</b>                                                 |
| 1270                                                   | 1280                                                   | 1290                                                   | 1300                                                   | 1310                                                          | 1320                                                                                                 |
| <b>D</b> T <b>A</b> A <b>V</b> K <b>V</b> E <b>F</b> D | <b>E</b> E <b>F</b> S <b>G</b> A <b>P</b> V <b>E</b> G | <b>A</b> G <b>E</b> E <b>A</b> L <b>T</b> P <b>S</b> V | <b>P</b> I <b>N</b> K <b>G</b> P <b>K</b> P <b>K</b> R | EKKEPGTRVR                                                    | KTPTSS <b>G</b> K <b>P</b> S                                                                         |
| 1330                                                   | 1340                                                   | 1350                                                   | 1360                                                   | 1370                                                          | 1380                                                                                                 |
| <b>A</b> K <b>K</b> V <b>K</b> K <b>R</b> N <b>P</b> W | S <b>D</b> D <b>E</b> S <b>K</b> S <b>E</b> S <b>D</b> | <b>L</b> E <b>E</b> T <b>E</b> P <b>V</b> V <b>I</b> P | <b>R</b> D <b>S</b> L <b>L</b> R <b>R</b> A <b>A</b>   | ERPKYTFDFS                                                    | EEEDDDADDD                                                                                           |
| 1390                                                   | 1400                                                   | 1410                                                   | 1420                                                   | 1430                                                          | 1440                                                                                                 |
| DDDNDLEEL                                              | K <b>V</b> K <b>A</b> S <b>P</b> I <b>T</b> N <b>D</b> | <b>G</b> E <b>D</b> E <b>F</b> V <b>P</b> S <b>D</b> G | <b>L</b> D <b>K</b> D <b>E</b> Y <b>T</b> F <b>S</b> P | <b>G</b> K <b>S</b> K <b>A</b> T <b>P</b> E <b>K</b> S        | <b>L</b> H <b>D</b> K <b>K</b> S <b>Q</b> D <b>F</b> G                                               |
| 1450                                                   | 1460                                                   | 1470                                                   | 1480                                                   | 1490                                                          | 1500                                                                                                 |
| <b>N</b> L <b>F</b> S <b>F</b> P <b>S</b> Y <b>S</b> Q | <b>K</b> S <b>E</b> D <b>D</b> S <b>A</b> K <b>F</b> D | <b>S</b> N <b>E</b> E <b>D</b> S <b>A</b> S <b>V</b> F | <b>S</b> P <b>S</b> F <b>G</b> L <b>K</b> Q <b>T</b> D | KVPSKTVA <b>A</b> K                                           | <b>K</b> G <b>K</b> P <b>S</b> S <b>D</b> T <b>V</b> P                                               |
| 1510                                                   | 1520                                                   | 1530                                                   | 1540                                                   | 1550                                                          | 1560                                                                                                 |
| <b>K</b> P <b>K</b> R <b>A</b> P <b>K</b> Q <b>K</b>   | VVEAVNSDS <b>D</b>                                     | SEFGIPK <b>K</b> T <b>T</b>                            | TPKGKGRG <b>A</b> K                                    | <b>K</b> R <b>K</b> A <b>S</b> G <b>S</b> E <b>N</b> E        | <b>G</b> D <b>Y</b> N <b>P</b> G <b>R</b> K <b>T</b> S                                               |
| 1570                                                   | 1580                                                   | 1590                                                   | 1600                                                   | 1610                                                          | 1620                                                                                                 |
| KTTSK <b>K</b> P <b>K</b> K <b>T</b>                   | SFDQDS <b>D</b> V <b>D</b> I                           | FPSDFP <b>T</b> E <b>P</b> P                           | SLPRTGR <b>A</b> R <b>K</b>                            | EVKYFAES <b>D</b> E                                           | EEDDV <b>D</b> F <b>A</b> <b>m</b> f                                                                 |

**B****Expected CNBr Peptides**

| <b>Amino Acid #</b> | <b>MW</b> | <b>Amino Acid Sequence</b>                                                                                                                                                                                                                                                                                                                                                                                    |
|---------------------|-----------|---------------------------------------------------------------------------------------------------------------------------------------------------------------------------------------------------------------------------------------------------------------------------------------------------------------------------------------------------------------------------------------------------------------|
| 2-77                | 8590.4    | AKSGGCGAGAGVGGNGALTWVNNAAKKEESETANKNDSSKKLSVERVYQKK<br>TQLEHILLRPDTYIGSVEPLTQFM                                                                                                                                                                                                                                                                                                                               |
| 78-86               | 1065.5    | WVYDEDVGM                                                                                                                                                                                                                                                                                                                                                                                                     |
| 87-118              | 3692.9    | NCREVTFVPGLYKIFDEILVNAADNKQRDKNM                                                                                                                                                                                                                                                                                                                                                                              |
| 119-211             | 10407.3   | TCIKVSI DPESNIISIWNNGK GIPVVEHKVEKVYVPALIFGQLLTSSNYDDD<br>EKKVTGGRNGYGAKLCNIFSTKFTVETACKEYKHSFKQ TW M                                                                                                                                                                                                                                                                                                         |
| 216-244             | 3359.7    | KTSEAKIKHFDGEDYTCITFQPDLSKFKM                                                                                                                                                                                                                                                                                                                                                                                 |
| 245-255             | 1226.7    | EKLDKDIVALM                                                                                                                                                                                                                                                                                                                                                                                                   |
| 256-272             | 1835.0    | TRRAYDLAGSCRGVKVM                                                                                                                                                                                                                                                                                                                                                                                             |
| 273-397             | 14127.5   | FNGKKLPVNGFRSYVDLYVKDKLDETGVALKVIHELANERWDVCLTLSEK<br>GFQQISFVNSIATTKGGRHVDYVVDQVVGKLIEVVKKKNKAGVSVKPFQV<br>KNHIWVFINCLIENPTFDSQTKENM                                                                                                                                                                                                                                                                         |
| 398-518             | 13118.0   | TLQPKSFGSKCQLSEKFFKAASNCGIVESILNWVKFKAQTQLNKKCSSVK<br>YSKIKGIPKLDDANDAGGKHSLECTLILTEGDSAKSLAVSGLGVIGRDRYGV<br>FPLRGKILNVR EASHKQIM                                                                                                                                                                                                                                                                            |
| 519-553             | 4010.2    | ENAEINNIKIIVGLQYKKSYYDDAESLKTLYGKIM                                                                                                                                                                                                                                                                                                                                                                           |
| 556-647             | 10774.5   | TDQDQD GSHIKGLLINFIIHNWPSLLKHGFLEEFITPIVKASKNKQELS<br>FYSIPEFDEWKKHIENQKAWKIKYYKGLGTSTAKEAKEYFADM                                                                                                                                                                                                                                                                                                             |
| 648-685             | 4533.4    | ERHRILFRYAGPEDDAITLAFS KKKIDDRKEWLTNFM                                                                                                                                                                                                                                                                                                                                                                        |
| 686-770             | 9817.1    | EDRRQRRLHGLPEQFLYGTATKHLTYNDFINKELILFNSDNERSIPSLV<br>DGFKPGQRKVLFTCFKRNDRKREVKVAQLAGSVAEM                                                                                                                                                                                                                                                                                                                     |
| 771-781             | 1195.6    | SAYHHGEQALM                                                                                                                                                                                                                                                                                                                                                                                                   |
| 783-825             | 4625.4    | TIVNLAQNFVGSNNINLLQPIGQFGTRLHGGKDAASPRYIFTM                                                                                                                                                                                                                                                                                                                                                                   |
| 826-863             | 4470.4    | LSTLARLLFPAVDDNLLKFLYDDNQRVEPEWYIPIIPM                                                                                                                                                                                                                                                                                                                                                                        |
| 864-895             | 3481.8    | VLINGAEGIGTGWACKLPNYDAREIVNNVRRM                                                                                                                                                                                                                                                                                                                                                                              |
| 896-904             | 946.5     | LDGLDPPHM                                                                                                                                                                                                                                                                                                                                                                                                     |
| 905-959             | 6364.3    | LPNYKNFKGTIQELGQNQYAVSGEIFVVDNRNTVEITELPVRTWTQVYKEQ<br>VLEPM                                                                                                                                                                                                                                                                                                                                                  |
| 960-988             | 3266.7    | LNGTDKTPALISDYKEYHTDT TVKFVVKM                                                                                                                                                                                                                                                                                                                                                                                |
| 989-1016            | 3014.6    | TEEKLAQAEAAGLHKVFKLQTTLTCNSM                                                                                                                                                                                                                                                                                                                                                                                  |
| 1017-1022           | 713.4     | VLFDHM                                                                                                                                                                                                                                                                                                                                                                                                        |
| 1023-1056           | 4093.2    | GCLKKYETVQDILKEFFDLRLSYGLRKEWL VGM                                                                                                                                                                                                                                                                                                                                                                            |
| 1057-1092           | 4080.3    | LGAESTKLNNQARFILEKIQGKITIENRSKDLIQM                                                                                                                                                                                                                                                                                                                                                                           |
| 1093-1144           | 5765.6    | LVQRGYESDPVKAWEAQAEEDE TQNQHDDSSSDSGTSPGPDFNYILNM                                                                                                                                                                                                                                                                                                                                                             |
| 1145-1206           | 7165.7    | SLWSLTKEKVEELIKQRDAKGREVNDLKRKSPDLWKEDLAAFVEELDKVESQ<br>EREDVLAGM                                                                                                                                                                                                                                                                                                                                             |
| 1207-1229           | 2449.5    | SGKAIKGVGKPKVKKLQLEETM                                                                                                                                                                                                                                                                                                                                                                                        |
| 1230-1244           | 1652.9    | PSPYGRRIPEITAM                                                                                                                                                                                                                                                                                                                                                                                                |
| 1245-1619           | 41192.6   | KADASKLLKKKKGDLDTAAVKVEFDEEFSGAPVEGAGEEALTPSV PINKGPK<br>PKREKKEPGTRV RKTPTSSGKPSAKKVKRNPWSDES KSESDL EETEPV<br>VIPRDSLRRAAAERPKYTFDFSEEDDDADDDDDNNDLEELKVKASPITN<br>DGEDEFVPSDGLDKDEYTFSPGKSKATPEKSLHDKKSQDFGNLFSFSPYS<br>QKSEDDSAKFDSNEEDSASVFSPSFGLKQTDKVPSKTVAACKGKPSSDTV<br>PKPKRAPKQKKVVEAVNSDSSEFGIPKKTTPKGKGRGAKKRKASGSEN<br>EGDYNPGRKTSKTTSKPKKTSFDQSDVDIFPSDFPTEPPSLPRTGRAR<br>KEVKYFAESDEEEDDVDFAM |

**Supplemental Figure 1.** (A) Amino acid sequence of topo II $\beta$ . The position of methionine residues (cleavage with CNBr) is marked in red and lower case letters. The highlighted peptides correspond to those that were detected by LC-MS/MS analysis following tryptic digests of the CNBr peptides separated on a polyacrylamide gel. (B) Size and sequence of peptides that would be expected to be generated following cleavage with CNBr.
