# Supplementary material
Source: PubMed Central journal article supplement (PMC3608106)
Supplement: NIHMS443254-supplement-Supplemental_methods.pdf [file NIHMS443254-supplement-Supplemental_methods.pdf]

# PROTEOMICS

## Supporting Information for Proteomics

**DOI 10.1002/pmic.201000194**

Adrian G. Grozav, Belinda B. Willard, Toshiyuki Kozuki,  
Kenichi Chikamori, Marius A. Micluta, Andrei-Jose Petrescu,  
Michael Kinter, Ram Ganapathi and Mahrukh K. Ganapathi

**Tyrosine 656 in topoisomerase II $\beta$  is important for the catalytic activity of the enzyme: Identification based on artifactual +80-Da modification at this site**

## Supplemental Method

### Metabolic labeling with [<sup>32</sup>P]orthophosphoric acid and phosphopeptide mapping

Log phase cultures of BJ201 yeast cells expressing WT or mutant topo II $\beta$  were first incubated in medium lacking phosphate and then incubated with carrier free [<sup>32</sup>P]orthophosphoric acid (250  $\mu$ Ci/ml) as described previously [29]. WT or mutant topo II $\beta$  purified by immunoprecipitation or Ni-NTA agarose chromatography and SDS-PAGE was transferred to nitrocellulose membrane and digested with trypsin as described earlier. The tryptic digests were subjected to 2D-phosphopeptide mapping involving electrophoresis with pH 1.9 buffer (88% formic acid/glacial acetic acid/deionized water – 1/3.1/36, v/v) in the horizontal dimension and chromatography in the vertical dimension using phosphochromatography buffer, (*n*-butyl alcohol/pyridine/acetic acid/deionized water – 5/3.3/1/4, v/v) or isobutyric acid buffer: isobutyric acid/*n*-butanol/pyridine/acetic acid/deionized water - 32.9/1/2.5/1.5/14.7, v/v)
