# Supplementary material
Source: PubMed Central journal article supplement (PMC3608106)
Supplement: NIHMS443254-supplement-Supplemental_table.pdf [file NIHMS443254-supplement-Supplemental_table.pdf]

**Supplemental Table 1:** Calculated (C) and measured (M)  $m/z$  values of the precursor ions and of identified fragment ions for peptides in Figures 1 – 5.

*av* = average mass; *mono* = monoisotopic mass; ▼ - loss of  $H_2O$ ; ■ - loss of  $NH_3$ .

| <b>Fig.1:</b> $^{1543}KAS^P GSENEG DYNPGRK^{1558}$ |       |                                |        |                           |                                             |                                             |                     |                     |   |
|----------------------------------------------------|-------|--------------------------------|--------|---------------------------|---------------------------------------------|---------------------------------------------|---------------------|---------------------|---|
| $MH_3^{+3}$ (av)                                   |       | $[M+3H]^{+3} - H_3PO_4$ (mono) |        |                           |                                             | $[M+3H]^{+3} - H_3PO_4$ (mono)              |                     |                     |   |
| C                                                  | M     | C                              | M      | C                         | M                                           | C                                           | M                   | C                   | M |
| 597.3                                              | 597.7 | 564.6                          | 564.9  | 558.6                     | 559.0                                       |                                             |                     |                     |   |
| b- $H_3PO_4$ (mono)                                |       | b ions (mono)                  |        | Peptide Sequence          | y ions (mono)                               |                                             | y- $H_3PO_4$ (mono) |                     |   |
| M                                                  | C     | M                              | C      |                           | C                                           | M                                           | C                   | M                   |   |
| ---                                                |       | ---                            |        | 1 <b>K</b> 16             |                                             |                                             |                     | ---                 |   |
|                                                    |       | 199.5                          | 200.1  | 2 <b>A</b> 15             |                                             |                                             | 781.8 <sup>2+</sup> | 782.3 <sup>2+</sup> |   |
| 269.2                                              | 269.2 | ■350.1                         | ■350.1 | 3 <b>S<sup>P</sup></b> 14 | 795.3 <sup>2+</sup><br>▼786.3 <sup>2+</sup> | 795.9 <sup>2+</sup><br>▼786.9 <sup>2+</sup> | 746.3               | 746.9 <sup>2+</sup> |   |
|                                                    |       |                                |        | 4 <b>G</b> 13             | 711.8 <sup>2+</sup><br>■703.3 <sup>2+</sup> | 712.4 <sup>2+</sup><br>■703.8 <sup>2+</sup> |                     |                     |   |
|                                                    |       |                                |        | 5 <b>S</b> 12             |                                             |                                             |                     |                     |   |
|                                                    |       |                                |        | 6 <b>E</b> 11             |                                             |                                             |                     |                     |   |
| 656.8                                              | 656.3 |                                |        | 7 <b>N</b> 10             | 575.3 <sup>2+</sup>                         | 575.4 <sup>2+</sup>                         |                     |                     |   |
|                                                    |       |                                |        | 8 <b>E</b> 9              |                                             |                                             |                     |                     |   |
|                                                    |       |                                |        | 9 <b>G</b> 8              | 906.4<br>453.7 <sup>2+</sup>                | 906.5<br>453.8 <sup>2+</sup>                |                     |                     |   |
| 957.5                                              | 957.4 | 1055.5                         | 1055.4 | 10 <b>D</b> 7             | 849.4<br>▼831.4                             | 849.7<br>▼831.8                             |                     |                     |   |
|                                                    |       |                                |        | 11 <b>Y</b> 6             | 734.4<br>367.7 <sup>2+</sup>                | 734.6<br>368.3 <sup>+2</sup>                |                     |                     |   |
|                                                    |       |                                |        | 12 <b>N</b> 5             | 571.3<br>■554.3<br>■277.6 <sup>2+</sup>     | 571.4<br>■554.5<br>■277.8 <sup>+2</sup>     |                     |                     |   |
|                                                    |       |                                |        | 13 <b>P</b> 4             | 457.3<br>■220.6 <sup>+2</sup>               | 457.5<br>■221.7 <sup>+2</sup>               |                     |                     |   |
|                                                    |       |                                |        | 14 <b>G</b> 3             |                                             |                                             |                     |                     |   |
|                                                    |       |                                |        | 15 <b>R</b> 2             |                                             |                                             |                     |                     |   |
|                                                    |       |                                |        | 16 <b>K</b> 1             |                                             |                                             |                     |                     |   |

| Fig.2A: <sup>1392</sup> VKAS <sup>P</sup> PITNDGEDEFVPSDGLDKDEYTFSPGK <sup>1422</sup> |                               |                                                              |                   |                                                               |                                                                  |                                                                                              |
|---------------------------------------------------------------------------------------|-------------------------------|--------------------------------------------------------------|-------------------|---------------------------------------------------------------|------------------------------------------------------------------|----------------------------------------------------------------------------------------------|
| MH <sub>3</sub> <sup>+3</sup> (av)                                                    |                               | [M+3H] <sup>+3</sup> - H <sub>3</sub> PO <sub>4</sub> (mono) |                   | [M+3H] <sup>▼+3</sup> - H <sub>3</sub> PO <sub>4</sub> (mono) |                                                                  |                                                                                              |
| C                                                                                     | M                             | C                                                            | M                 | C                                                             | M                                                                |                                                                                              |
| 1147.2                                                                                | <b>1147.4</b>                 | 1114.5                                                       | <b>1114.7</b>     | 1108.5                                                        | <b>1108.4</b>                                                    |                                                                                              |
| b-H <sub>3</sub> PO <sub>4</sub> (mono)                                               |                               | b ions (mono)                                                |                   | Peptide Sequence                                              | y ions (mono)                                                    |                                                                                              |
| M                                                                                     | C                             | M                                                            | C                 |                                                               | C                                                                | M                                                                                            |
| ---                                                                                   |                               |                                                              |                   | 1 V 31                                                        | ---                                                              |                                                                                              |
| ---                                                                                   |                               |                                                              |                   | 2 K 30                                                        |                                                                  |                                                                                              |
| ---                                                                                   |                               |                                                              |                   | 3 A 29                                                        |                                                                  |                                                                                              |
| ---                                                                                   |                               |                                                              |                   | 4 S <sup>P</sup> 28                                           | 1570.2 <sup>+2</sup><br>▼1561.1 <sup>+2</sup>                    | <b>1570.2<sup>+2</sup></b><br>▼ <b>1561.2<sup>+2</sup></b>                                   |
| ---                                                                                   |                               |                                                              |                   | 5 P 27                                                        | 1486.7 <sup>+2</sup><br>■1478.2 <sup>+2</sup>                    | <b>1486.8<sup>+2</sup></b><br>■ <b>1478.4<sup>+2</sup></b>                                   |
| <b>578.9</b>                                                                          | 578.4                         | <b>676.6</b>                                                 | 676.3             | 6 I 26                                                        |                                                                  |                                                                                              |
|                                                                                       |                               |                                                              |                   | 7 T 25                                                        | 1381.6 <sup>+2</sup>                                             | <b>1382.3<sup>+2</sup></b>                                                                   |
|                                                                                       |                               |                                                              |                   | 8 N 24                                                        |                                                                  |                                                                                              |
|                                                                                       |                               | <b>1006.7</b>                                                | 1006.5            | 9 D 23                                                        | 1274.1 <sup>+2</sup>                                             | <b>1274.8<sup>+2</sup></b>                                                                   |
|                                                                                       |                               |                                                              |                   | 10 G 22                                                       | 1216.5 <sup>+2</sup>                                             | <b>1217.2<sup>+2</sup></b>                                                                   |
|                                                                                       |                               |                                                              |                   | 11 E 21                                                       |                                                                  |                                                                                              |
|                                                                                       |                               | <b>1308.0</b>                                                | 1307.6            | 12 D 20                                                       |                                                                  |                                                                                              |
|                                                                                       |                               |                                                              |                   | 13 E 19                                                       | 1066.0 <sup>+2</sup>                                             | <b>1066.2<sup>+2</sup></b>                                                                   |
|                                                                                       |                               |                                                              |                   | 14 F 18                                                       |                                                                  |                                                                                              |
| <b>1584.7</b><br><b>793.1<sup>+2</sup></b>                                            | 1584.7<br>792.9 <sup>+2</sup> | <b>1682.7</b><br>■ <b>1665.7</b>                             | 1682.7<br>■1665.7 | 15 V 17                                                       | 1854.9                                                           | <b>1855.1</b>                                                                                |
|                                                                                       |                               |                                                              |                   | 16 P 16                                                       | 1755.8<br>▼1737.8<br>878.4 <sup>+2</sup><br>▼869.4 <sup>+2</sup> | <b>1755.8</b><br>▼ <b>1737.7</b><br><b>878.9<sup>+2</sup></b><br>▼ <b>869.8<sup>+2</sup></b> |
|                                                                                       |                               |                                                              |                   | 17 S 15                                                       |                                                                  |                                                                                              |
|                                                                                       |                               | <b>1981.8</b>                                                | 1981.8            | 18 D 14                                                       |                                                                  |                                                                                              |
|                                                                                       |                               |                                                              |                   | 19 G 13                                                       | 1456.7<br>728.9 <sup>+2</sup>                                    | <b>1456.7</b><br><b>729.6<sup>+2</sup></b>                                                   |

|    |          |    |          |    |        |               |
|----|----------|----|----------|----|--------|---------------|
|    |          | 20 | <b>L</b> | 12 |        |               |
|    |          | 21 | <b>D</b> | 11 |        |               |
|    |          | 22 | <b>K</b> | 10 | 1171.6 | <b>1171.7</b> |
|    |          | 23 | <b>D</b> | 9  | 1043.5 | <b>1043.8</b> |
|    |          | 24 | <b>E</b> | 8  | 928.4  | <b>928.7</b>  |
|    |          | 25 | <b>Y</b> | 7  |        |               |
|    |          | 26 | <b>T</b> | 6  |        |               |
|    |          | 27 | <b>F</b> | 5  | 535.3  | <b>535.4</b>  |
|    |          | 28 | <b>S</b> | 4  | ▼370.2 | <b>▼370.4</b> |
|    |          | 29 | <b>P</b> | 3  |        |               |
|    |          | 30 | <b>G</b> | 2  |        |               |
| 31 | <b>K</b> | 1  |          |    |        |               |

| <b>Fig.2B:</b> $^{1423}\text{SKAT}^{\text{P}}\text{PEKSLHDKK}^{1435}$ |              |                                                               |              |                                             |              |                                                                     |              |
|-----------------------------------------------------------------------|--------------|---------------------------------------------------------------|--------------|---------------------------------------------|--------------|---------------------------------------------------------------------|--------------|
| $\text{MH}_3^{+3}$<br>(av)                                            |              | $[\text{M}+3\text{H}]^{+3} - \text{H}_3\text{PO}_4$<br>(mono) |              | $[\text{M}+3\text{H}]^{\nabla+3}$<br>(mono) |              | $[\text{M}+3\text{H}]^{\nabla+3} - \text{H}_3\text{PO}_4$<br>(mono) |              |
| C                                                                     | M            | C                                                             | M            | C                                           | M            | C                                                                   | M            |
| 517.2                                                                 | <b>517.9</b> | 484.3                                                         | <b>484.9</b> | 510.9                                       | <b>511.5</b> | 478.3                                                               | <b>479.2</b> |

| <b>b-H<sub>3</sub>PO<sub>4</sub></b><br>(mono) |                     | <b>b ions (mono)</b>      |                     | <b>Peptide<br/>Sequence</b> | <b>y ions (mono)</b>                        |                                                   | <b>y-H<sub>3</sub>PO<sub>4</sub> (mono)</b> |                                                   |
|------------------------------------------------|---------------------|---------------------------|---------------------|-----------------------------|---------------------------------------------|---------------------------------------------------|---------------------------------------------|---------------------------------------------------|
| M                                              | C                   | M                         | C                   |                             | C                                           | M                                                 | C                                           | M                                                 |
|                                                |                     |                           | ---                 | 1 S 13                      |                                             |                                                   |                                             | ---                                               |
|                                                |                     | <b>216.4</b>              | 216.1               | 2 K 12                      |                                             |                                                   |                                             |                                                   |
|                                                |                     |                           |                     | 3 A 11                      | 667.3 <sup>+2</sup>                         | <b>667.7<sup>+2</sup></b>                         | 618.3 <sup>+2</sup><br>▼603.7 <sup>+2</sup> | <b>618.7<sup>+2</sup></b><br>▼609.7 <sup>+2</sup> |
| <b>370.6</b>                                   | 370.2               | <b>468.4</b>              | 468.2               | 4 T <sup>P</sup> 10         |                                             |                                                   |                                             |                                                   |
|                                                |                     |                           |                     | 5 P 9                       | 541.3 <sup>+2</sup><br>■532.8 <sup>+2</sup> | <b>541.9<sup>+2</sup></b><br>■533.2 <sup>+2</sup> |                                             |                                                   |
|                                                |                     | <b>694.4</b>              | 694.3               | 6 E 8                       |                                             |                                                   |                                             |                                                   |
|                                                |                     |                           |                     | 7 K 7                       |                                             |                                                   |                                             |                                                   |
|                                                |                     |                           |                     | 8 S 6                       | ■710.4                                      | <b>■711.0</b>                                     |                                             |                                                   |
|                                                |                     |                           |                     | 9 L 5                       |                                             |                                                   |                                             |                                                   |
|                                                |                     |                           |                     | 10 H 4                      |                                             |                                                   |                                             |                                                   |
| <b>589.5<sup>+2</sup></b>                      | 588.8 <sup>+2</sup> | <b>638.3<sup>+2</sup></b> | 637.8 <sup>+2</sup> | 11 D 3                      |                                             |                                                   |                                             |                                                   |
|                                                |                     | <b>702.3<sup>+2</sup></b> | 701.8 <sup>+2</sup> | 12 K 2                      | 275.2                                       | <b>275.5</b>                                      |                                             |                                                   |
|                                                |                     |                           |                     | 13 K 1                      |                                             |                                                   |                                             |                                                   |

| <b>Fig.3A: <math>^{656}\text{YAGPEDDAAITLAFSK}^{671}</math></b> |                             |                                                            |                                     |                                     |
|-----------------------------------------------------------------|-----------------------------|------------------------------------------------------------|-------------------------------------|-------------------------------------|
| <b><math>\text{MH}_2^{+2}</math> (av)</b>                       |                             | <b><math>[\text{M}+2\text{H}]^{\nabla+2}</math> (mono)</b> |                                     |                                     |
| <b>C</b>                                                        | <b>M</b>                    | <b>C</b>                                                   | <b>M</b>                            |                                     |
| 835.4                                                           | <b>835.8</b>                | 825.9                                                      | <b>826.0</b>                        |                                     |
| <b>b ions (mono)</b>                                            |                             | <b>Peptide Sequence</b>                                    | <b>y ions (mono)</b>                |                                     |
| <b>M</b>                                                        | <b>C</b>                    |                                                            | <b>C</b>                            | <b>M</b>                            |
| ---                                                             |                             | 1 <b>Y</b> 16                                              | ---                                 |                                     |
|                                                                 |                             | 2 <b>A</b> 15                                              |                                     |                                     |
|                                                                 |                             | 3 <b>G</b> 14                                              | $717.9^{+2}$<br>$\nabla 708.9^{+2}$ | $718.2^{+2}$<br>$\nabla 709.2^{+2}$ |
|                                                                 |                             | 4 <b>P</b> 13                                              | $689.3^{+2}$                        | <b><math>689.7^{+2}</math></b>      |
|                                                                 |                             | 5 <b>E</b> 12                                              |                                     |                                     |
|                                                                 |                             | 6 <b>D</b> 11                                              | 1151.6                              | <b>1151.7</b>                       |
|                                                                 |                             | 7 <b>D</b> 10                                              | 1036.6                              | <b>1036.6</b>                       |
|                                                                 |                             | 8 <b>A</b> 9                                               | 921.5                               | <b>921.7</b>                        |
| <b>890.5</b>                                                    | 890.4                       | 9 <b>A</b> 8                                               | 850.5                               | <b>850.7</b>                        |
|                                                                 |                             | 10 <b>I</b> 7                                              | 779.5                               | <b>779.6</b>                        |
|                                                                 |                             | 11 <b>T</b> 6                                              | 666.4                               | <b>666.5</b>                        |
| $1217.5$<br>$\nabla 1199.6$                                     | $1217.6$<br>$\nabla 1199.5$ | 12 <b>L</b> 5                                              | 565.3                               | <b>565.6</b>                        |
| $\nabla 1417.5$                                                 | $\nabla 1417.6$             | 13 <b>A</b> 4                                              | 452.3                               | <b>452.4</b>                        |
|                                                                 |                             | 14 <b>F</b> 3                                              | 381.2                               | <b>381.2</b>                        |
|                                                                 |                             | 15 <b>S</b> 2                                              |                                     |                                     |
|                                                                 |                             | 16 <b>K</b> 1                                              |                                     |                                     |

| <b>Fig.3B: <math>^{656}\text{Y}^* \text{AGPEDDAITLAFSK}^{671}</math></b> |          |                         |                                                       |                                                       |
|--------------------------------------------------------------------------|----------|-------------------------|-------------------------------------------------------|-------------------------------------------------------|
| <b><math>\text{MH}_2^{+2}</math> (av)</b>                                |          |                         |                                                       |                                                       |
| <b>C</b>                                                                 |          |                         | <b>M</b>                                              |                                                       |
| 875.4                                                                    |          |                         | 875.2                                                 |                                                       |
| <b>b ions (mono)</b>                                                     |          | <b>Peptide Sequence</b> | <b>y ions (mono)</b>                                  |                                                       |
| <b>M</b>                                                                 | <b>C</b> |                         | <b>C</b>                                              | <b>M</b>                                              |
| ---                                                                      |          | 1 <b>Y</b> 16           | ---                                                   |                                                       |
|                                                                          |          | 2 <b>A</b> 15           |                                                       |                                                       |
|                                                                          |          | 3 <b>G</b> 14           | 1434.7<br>717.9 <sup>+2</sup><br>▼708.9 <sup>+2</sup> | 1434.8<br>718.3 <sup>+2</sup><br>▼708.9 <sup>+2</sup> |
|                                                                          |          | 4 <b>P</b> 13           | 1377.7<br>689.3 <sup>+2</sup>                         | 1377.7<br>689.5 <sup>+2</sup>                         |
|                                                                          |          | 5 <b>E</b> 12           |                                                       |                                                       |
|                                                                          |          | 6 <b>D</b> 11           | 1151.6                                                | 1151.7                                                |
|                                                                          |          | 7 <b>D</b> 10           | 1036.6                                                | 1036.6                                                |
|                                                                          |          | 8 <b>A</b> 9            | 921.5                                                 | 921.6                                                 |
| 971.2                                                                    | 970.3    | 9 <b>A</b> 8            | 850.5                                                 | 850.7                                                 |
|                                                                          |          | 10 <b>I</b> 7           | 779.5                                                 | 779.4                                                 |
|                                                                          |          | 11 <b>T</b> 6           | 666.4                                                 | 666.5                                                 |
|                                                                          |          | 12 <b>L</b> 5           |                                                       |                                                       |
|                                                                          |          | 13 <b>A</b> 4           | 452.3                                                 | 452.4                                                 |
|                                                                          |          | 14 <b>F</b> 3           |                                                       |                                                       |
|                                                                          |          | 15 <b>S</b> 2           |                                                       |                                                       |
|                                                                          |          | 16 <b>K</b> 1           |                                                       |                                                       |

| <b>Fig.4: <math>^{656}\text{Y}^* \text{AGPEDDAAITLAFSK}^{671}</math></b> |               |                         |                      |                     |
|--------------------------------------------------------------------------|---------------|-------------------------|----------------------|---------------------|
| <b><math>\text{MH}_2^{+2}</math> (av)</b>                                |               |                         |                      |                     |
| <b>C</b>                                                                 |               |                         | <b>M</b>             |                     |
| 875.4                                                                    |               |                         | 875.2                |                     |
| <b>b ions (mono)</b><br>[+80 / +78 doublets]                             |               | <b>Peptide Sequence</b> | <b>y ions (mono)</b> |                     |
| <b>M</b>                                                                 | <b>C</b>      |                         | <b>C</b>             | <b>M</b>            |
| ---                                                                      |               | 1 <b>Y</b> 16           | ---                  |                     |
|                                                                          |               | 2 <b>A</b> 15           |                      |                     |
|                                                                          |               | 3 <b>G</b> 14           |                      |                     |
|                                                                          |               | 4 <b>P</b> 13           | 689.3 <sup>+2</sup>  | 689.8 <sup>+2</sup> |
|                                                                          |               | 5 <b>E</b> 12           | 1280.6               | 1280.6              |
|                                                                          |               | 6 <b>D</b> 11           | 1151.6               | 1151.8              |
|                                                                          |               | 7 <b>D</b> 10           | 1036.6               | 1036.8              |
|                                                                          |               | 8 <b>A</b> 9            | 921.5                | 921.7               |
| [970.3 / 968.3]                                                          | [970.3 / -2]  | 9 <b>A</b> 8            | 850.5                | 850.6               |
|                                                                          |               | 10 <b>I</b> 7           | 779.5                | 779.6               |
| [1184.6 / 1182.6]<br>(+80/+78 doublet,<br>low intensity)                 | [1184.5 / -2] | 11 <b>T</b> 6           | 666.4                | 666.6               |
|                                                                          |               | 12 <b>L</b> 5           | 565.3                | 565.6               |
|                                                                          |               | 13 <b>A</b> 4           | 452.3                | 452.5               |
|                                                                          |               | 14 <b>F</b> 3           | 381.2                | 381.4               |
|                                                                          |               | 15 <b>S</b> 2           |                      |                     |
|                                                                          |               | 16 <b>K</b> 1           |                      |                     |

| <b>Fig.5A:</b> <sup>708</sup> HLTYNDFINK <sup>717</sup> |                                     |                                    |                      |                         |
|---------------------------------------------------------|-------------------------------------|------------------------------------|----------------------|-------------------------|
| <b>MH<sub>2</sub><sup>+2</sup> (av)</b>                 |                                     | <b>[M+2H]<sup>▼+2</sup> (mono)</b> |                      |                         |
| <b>C</b>                                                | <b>M</b>                            | <b>C</b>                           | <b>M</b>             |                         |
| 633.2                                                   | <b>633.7</b>                        | 623.8                              | <b>624.5</b>         |                         |
| <b>b ions (mono)</b>                                    |                                     | <b>Peptide Sequence</b>            | <b>y ions (mono)</b> |                         |
| <b>M</b>                                                | <b>C</b>                            |                                    | <b>C</b>             | <b>M</b>                |
| ---                                                     |                                     | 1 <b>H</b> 10                      | ---                  |                         |
| <b>251.4</b><br>223.4 (a <sub>2</sub> ion)              | 251.1<br>223.2 (a <sub>2</sub> ion) | 2 <b>L</b> 9                       | 1127.6               | <b>1127.7</b>           |
| <b>352.4</b>                                            | 352.2                               | 3 <b>T</b> 8                       | 1014.5<br>▼996.5     | <b>1014.7</b><br>▼996.8 |
|                                                         |                                     | 4 <b>Y</b> 7                       | 913.4                | <b>913.7</b>            |
|                                                         |                                     | 5 <b>N</b> 6                       | 750.4                | <b>750.7</b>            |
| <b>744.6</b><br>▼726.7                                  | 744.3<br>▼726.3                     | 6 <b>D</b> 5                       |                      |                         |
| <b>891.7</b><br>▼873.7                                  | 891.4<br>▼873.4                     | 7 <b>F</b> 4                       | 521.3                | <b>521.6</b>            |
| <b>1004.7</b><br>▼986.7                                 | 1004.5<br>▼986.5                    | 8 <b>I</b> 3                       | 374.2                | <b>374.4</b>            |
| <b>1118.7</b>                                           | 1118.5                              | 9 <b>N</b> 2                       | 261.2                | <b>261.4</b>            |
|                                                         |                                     | 10 <b>K</b> 1                      |                      |                         |



| <b>Fig.5B:</b>                                        |                                     |                         |                                              | <b><sup>708</sup>HLTY*<sup>717</sup>NDFINK</b>        |          |          |          |
|-------------------------------------------------------|-------------------------------------|-------------------------|----------------------------------------------|-------------------------------------------------------|----------|----------|----------|
| <b>MH<sub>2</sub><sup>+2</sup> (av)</b>               |                                     |                         |                                              | <b>[M+2H]<sup>▼+2</sup> (mono)</b>                    |          |          |          |
| <b>C</b>                                              | <b>M</b>                            | <b>C</b>                | <b>M</b>                                     | <b>C</b>                                              | <b>M</b> | <b>C</b> | <b>M</b> |
| 673.2                                                 | <b>672.4</b>                        | 663.8                   | <b>663.6</b>                                 |                                                       |          |          |          |
| <b>b ions (mono)</b><br>[+80 / +78 doublets]          |                                     | <b>Peptide Sequence</b> | <b>y ions (mono)</b><br>[+80 / +78 doublets] |                                                       |          |          |          |
| <b>M</b>                                              | <b>C</b>                            |                         | <b>C</b>                                     | <b>M</b>                                              |          |          |          |
|                                                       | ---                                 | 1 <b>H</b> 10           |                                              | ---                                                   |          |          |          |
| <b>251.4</b><br><b>223.4 (a<sub>2</sub> ion)</b>      | 251.1<br>223.2 (a <sub>2</sub> ion) | 2 <b>L</b> 9            | [1207.5 /-2]                                 | <b>[1207.6 / 1205.6]</b>                              |          |          |          |
| <b>352.4</b>                                          | 352.2                               | 3 <b>T</b> 8            | [1094.5 /-2]<br>[▼1076.4 /-2]                | <b>[1094.6 / 1092.7]</b><br><b>[▼1076.7 / 1074.7]</b> |          |          |          |
|                                                       |                                     | 4 <b>Y*</b> 7           | [993.4 /-2]                                  | <b>[993.7 / 991.7]</b>                                |          |          |          |
|                                                       |                                     | 5 <b>N</b> 6            | 750.4                                        | <b>750.8</b>                                          |          |          |          |
| <b>[824.6 / 822.6]</b><br><b>[▼806.7 / 804.6]</b>     | [824.3 /-2]<br>[▼806.3 /-2]         | 6 <b>D</b> 5            |                                              |                                                       |          |          |          |
| <b>[971.7 / 969.7]</b><br><b>[▼953.6 / 951.4]</b>     | [971.4 /-2]<br>[▼953.4 /-2]         | 7 <b>F</b> 4            | 521.3                                        | <b>521.6</b>                                          |          |          |          |
| <b>[1084.7 / 1082.8]</b><br><b>[▼1066.7 / 1064.7]</b> | [1084.4 /-2]<br>[▼1066.4 /-2]       | 8 <b>I</b> 3            | 374.2                                        | <b>374.4</b>                                          |          |          |          |
|                                                       |                                     | 9 <b>N</b> 2            | 261.2                                        | <b>261.4</b>                                          |          |          |          |
|                                                       |                                     | 10 <b>K</b> 1           |                                              |                                                       |          |          |          |
